# Supplementary material
Source: PubMed Central journal article supplement (PMC7061421)

## **Supporting information**

### **Isolation and Rationale for the Formation of Isomeric Decarbamoylmitomycin C-*N*<sup>6</sup>- deoxyadenosine Adducts in DNA**

Owen Zacarias<sup>†</sup>, William Aguilar<sup>†</sup>, Manuel M. Paz<sup>‡</sup>, Sergey Tsukanov<sup>†</sup>, Maggie Zheng<sup>†</sup>, Shu-Yuan Cheng<sup>†</sup>, Padmanava Pradhan<sup>Δ</sup> and Elise Champeil<sup>†, §, \*</sup>

<sup>†</sup> John Jay College of Criminal Justice, 524 west 59<sup>th</sup> street, New-York, NY, 10019, United States

<sup>‡</sup> Departamento de Química Orgánica, Facultade de Química, Universidade de Santiago de Compostela, 15782 Santiago de Compostela, Spain

<sup>§</sup> Ph.D. Program in Chemistry, The Graduate Center of the City University of New York, New York, NY 10016, United States

<sup>Δ</sup> ppradhan@ccny.cuny.edu, The City College of New York, Marshak Science Building, MR-1024, 160 Convent Avenue, New York, NY 10031. United States

#### **Corresponding Author:**

Elise Champeil [echampeil@jjay.cuny.edu](mailto:echampeil@jjay.cuny.edu). John Jay College of Criminal Justice, 524 west 59<sup>th</sup> street, New York, NY, 10019.

## **Table of content:**

|                                                                                                                                                                                                                                                                                                                                               | <b><u>pages</u></b> |
|-----------------------------------------------------------------------------------------------------------------------------------------------------------------------------------------------------------------------------------------------------------------------------------------------------------------------------------------------|---------------------|
| <b>Figure S1:</b> HPLC chromatogram of pure <b>5a</b> and <b>5b</b> under conditions described in methods.                                                                                                                                                                                                                                    | S3                  |
| <b>Figure S2.</b> HPLC chromatograms of (a) digest of DMC-oligonucleotide complex formed under DMC bifunctional activation with oligonucleotide <b>9</b> (b) co-injection with adduct <b>5a</b> (c) co-injection with adduct <b>5b</b> .                                                                                                      | S4                  |
| <b>Figure S3.</b> HPLC chromatograms of (a) digest of DMC-oligonucleotide complex formed under DMC bifunctional activation with duplex <b>6</b> (b) co-injection with <b>5a</b> (c) co-injection with adduct <b>5b</b> .                                                                                                                      | S5                  |
| <b>Figure S4.</b> HRMS of adduct <b>5a</b> .                                                                                                                                                                                                                                                                                                  | S6                  |
| <b>Figure S5.</b> HRMS of adduct <b>5b</b> .                                                                                                                                                                                                                                                                                                  | S7                  |
| <b>Figure S6:</b> HPLC of (a) digest of duplex <b>6</b> treated with DMC under bifunctional conditions without nuclease P <sub>1</sub> ; (b) same sample with co-injection of standard <b>5a</b> ; (c) same sample with co-injection of standard <b>5b</b> ; (d) same sample but digest of duplex <b>6</b> includes nuclease P <sub>1</sub> . | S8                  |
| <b>Figure S7:</b> UV spectra of compounds <b>X</b> and <b>Y</b> .                                                                                                                                                                                                                                                                             | S8                  |
| <b>Table S1:</b> Frequencies of DNA adducts detected in short oligonucleotides after alkylation by DMC under bifunctional conditions at 0°C and 37°C.                                                                                                                                                                                         | S9-S10              |
| <b>Figure S8:</b> <sup>1</sup> H NMR spectrum of compound <b>5a</b> .                                                                                                                                                                                                                                                                         | S11                 |
| <b>Figure S9:</b> 2-D COSY NMR spectrum of compound <b>5a</b> .                                                                                                                                                                                                                                                                               | S12                 |

**Figure S10:**  $^1\text{H}$  NMR spectrum of compound **5b**.

S13

**Figure S11:** 2-D COSY NMR spectrum of compound **5b**.

S14

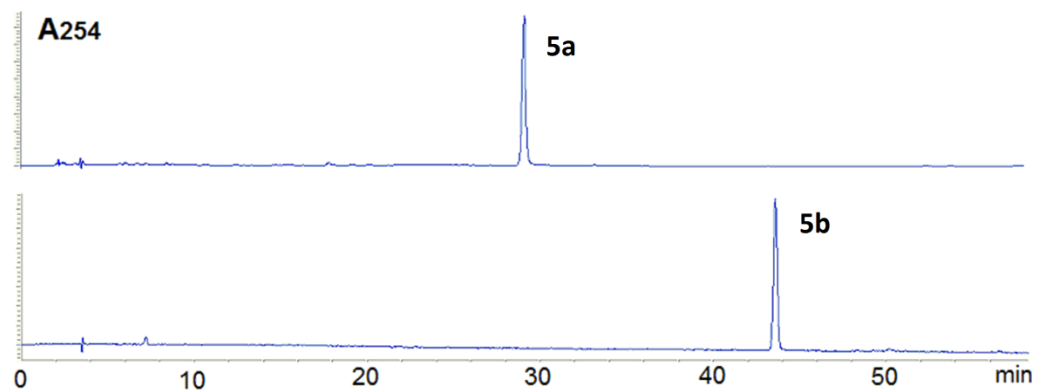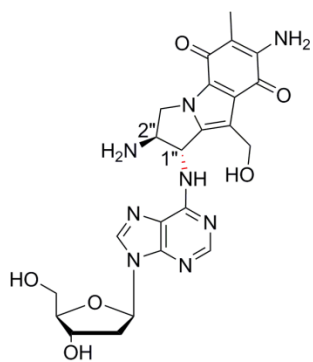

**5a** : trans, 1''- $\alpha$  dA(DMC)

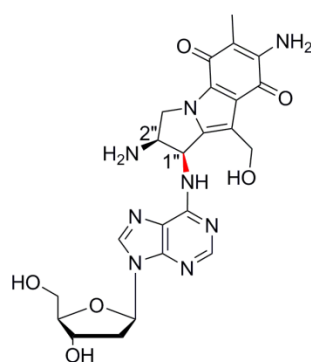

**5b** : cis, 1''- $\beta$  dA(DMC)

**Figure S1:** HPLC chromatogram of pure **5a** and **5b** under conditions described in methods.

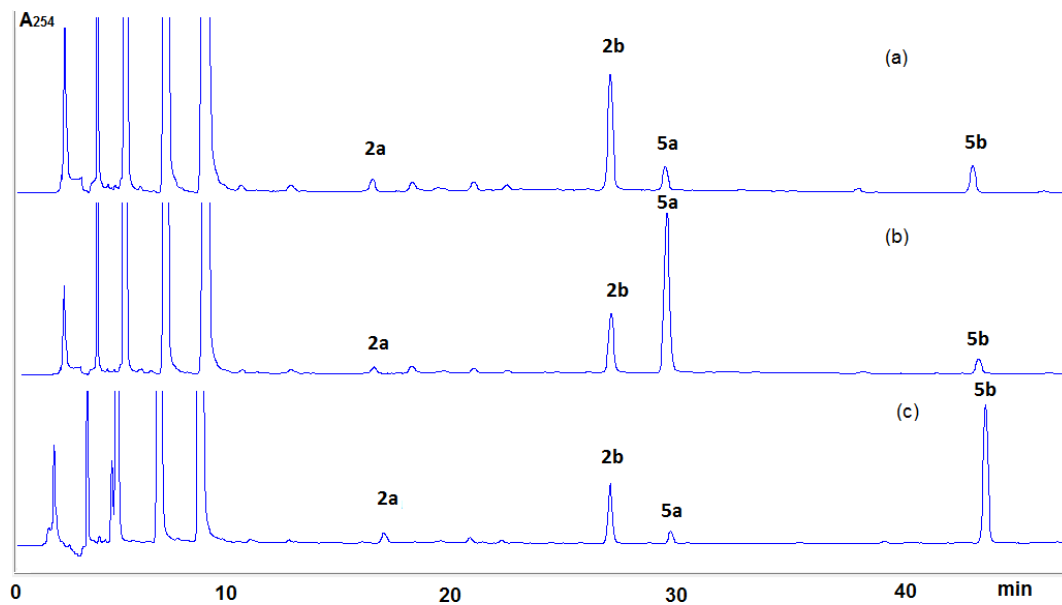

**Figure S2.** HPLC chromatograms of (a) digest of DMC-oligonucleotide complex formed under DMC bifunctional activation with oligonucleotide **9** (b) co-injection with adduct **5a** (c) co-injection with adduct **5b**.

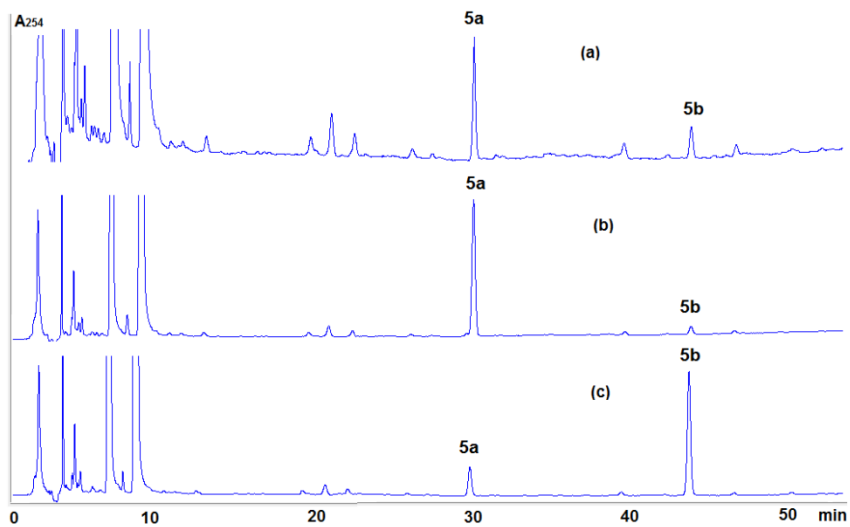

**Figure S3.** HPLC chromatograms of (a) digest of DMC-oligonucleotide complex formed under DMC bifunctional activation with duplex **6** d(AAAAAAAAAAAA).(TTTTTTTTTTTTT ) (b) co-injection with **5a** (c) co-injection with adduct **5b**.

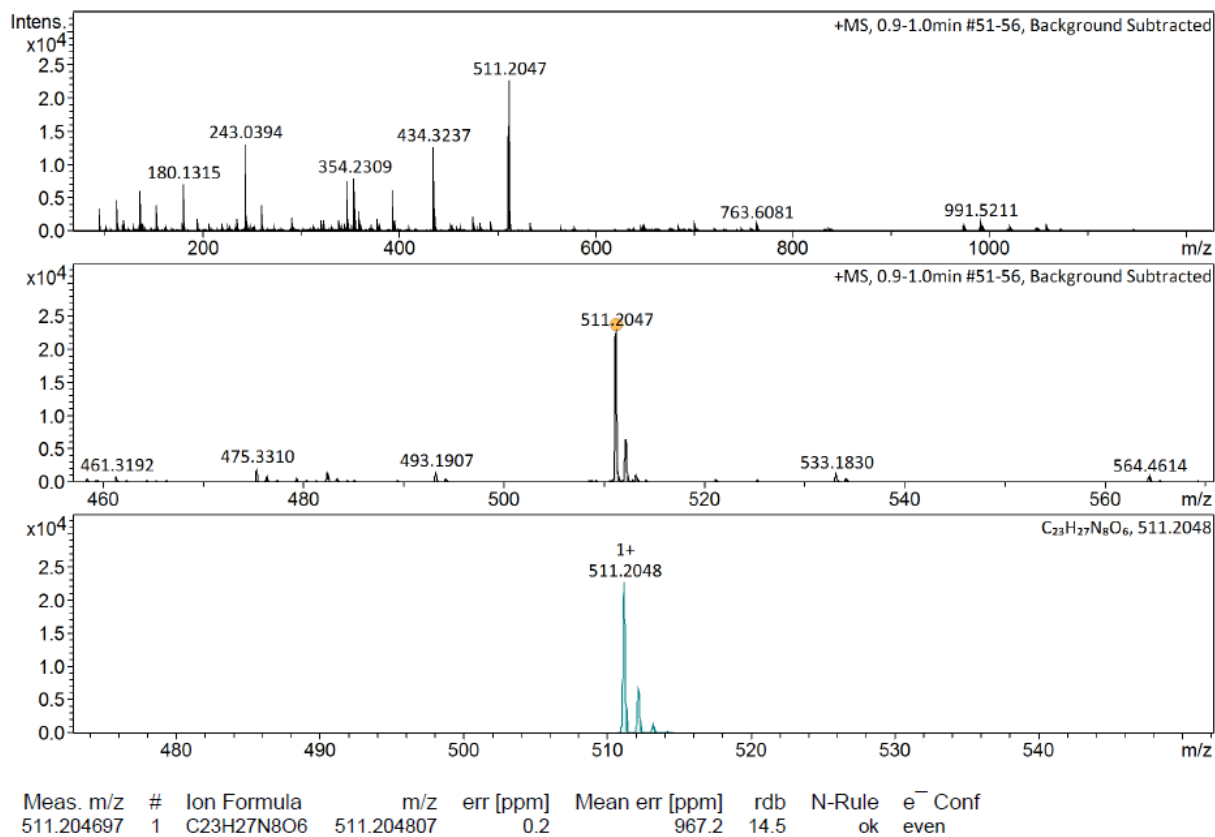

**Figure S4.** HRMS of adduct **5a**.

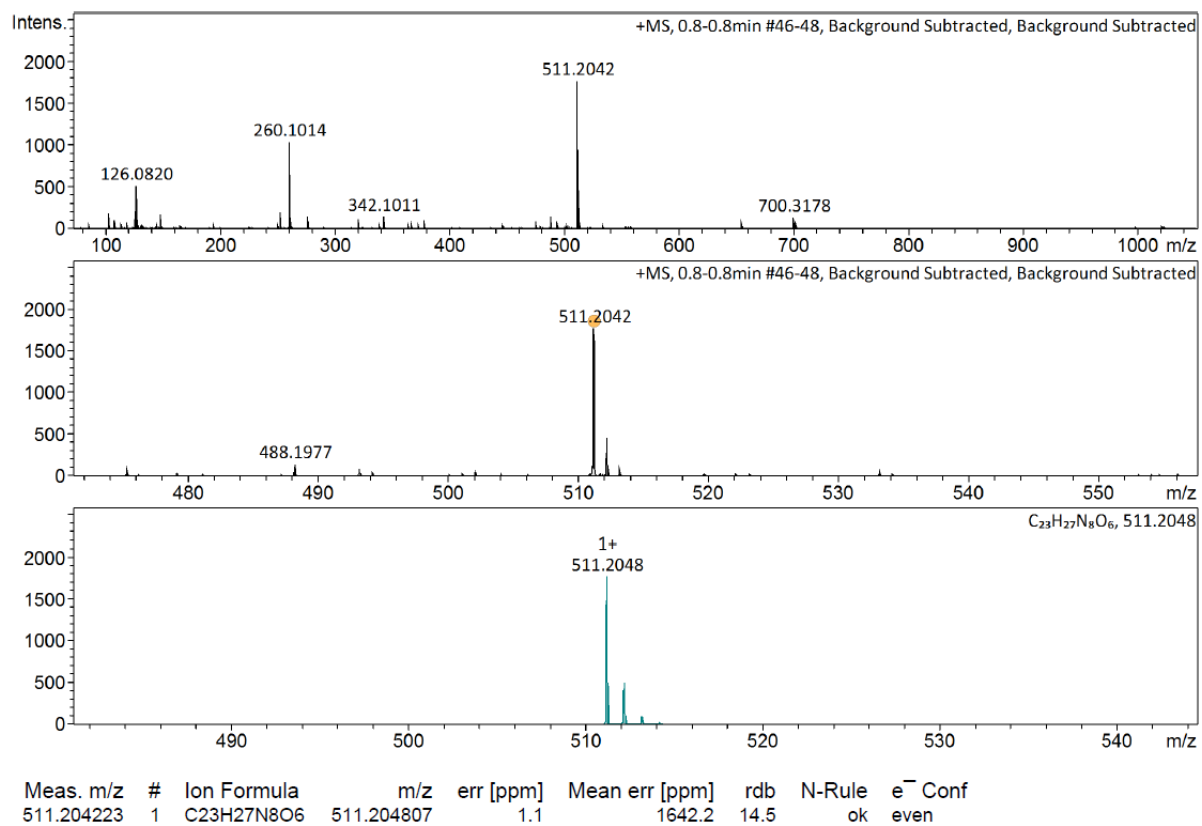

**Figure S5.** HRMS of adduct **5b**.

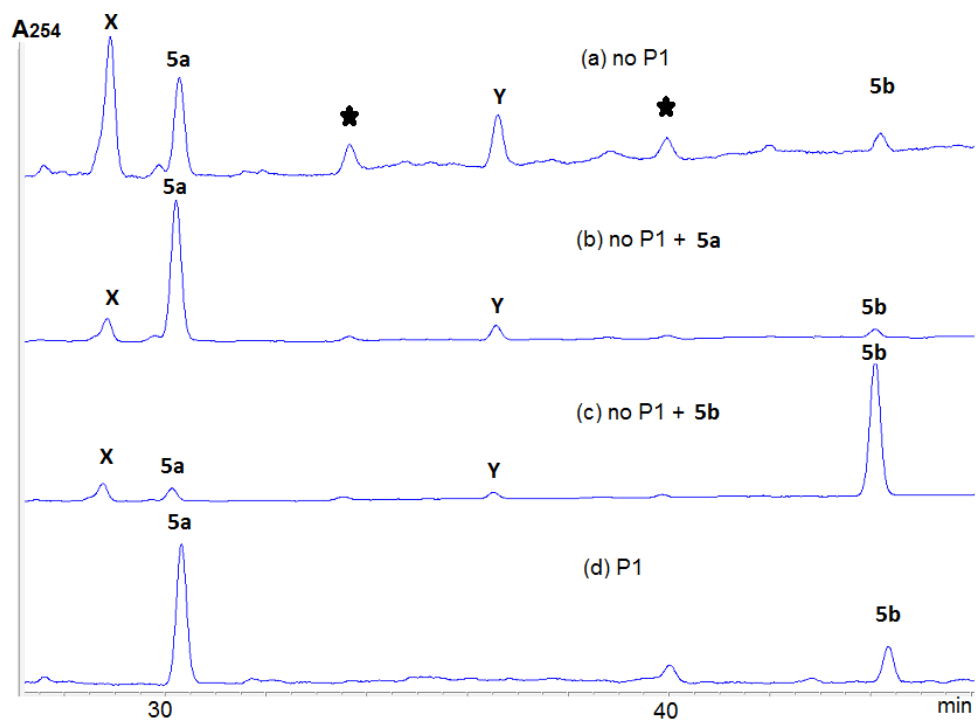

**Figure S6:** HPLC of (a) digest of duplex **6** d(AAAAAAAAAAAAAA).(TTTTTTTTTTTTTT ) treated with DMC under bifunctional conditions without nuclease P<sub>1</sub>; (b) same sample with co-injection of standard **5a**; (c) same sample with co-injection of standard **5b**; (d) same sample but digest of duplex **6** includes nuclease P<sub>1</sub>.

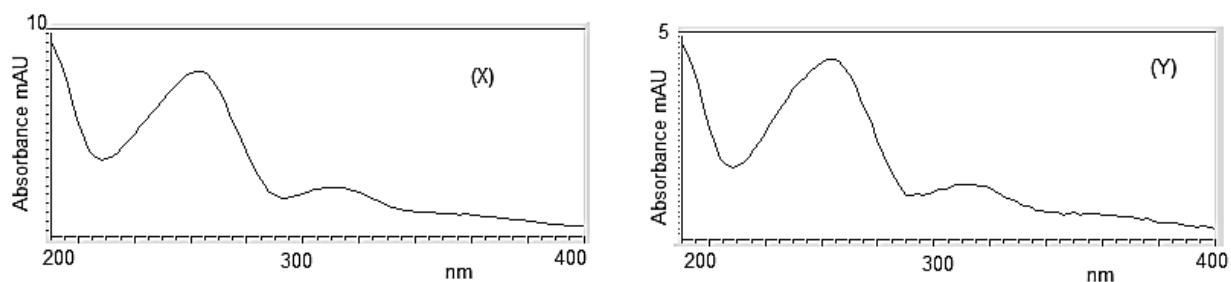

**Figure S7:** UV spectra of compounds **X** and **Y**.



**Table S1.** Frequencies of DNA Adducts Detected in Short Oligonucleotides under Bifunctional Conditions at 0°C and 37°C. ND= non-detected, NA=non-available.

| Oligonucleotide                                  | Frequencies (%) of adducts detected |                     |                |                   |                   |            |
|--------------------------------------------------|-------------------------------------|---------------------|----------------|-------------------|-------------------|------------|
|                                                  | dG <sub>(DMC)</sub>                 | dA <sub>(DMC)</sub> | R <sup>a</sup> | 5a                | 5b                | Log(5a/5b) |
| <b>6:</b> 5'-AAAAAAAAAAAAA<br>3'-TTTTTTTTTTTT    | na                                  | 0.22<br>(±0.02)     | na             | 0.17<br>(±0.02)   | 0.045<br>(±0.005) | 0.47       |
| <b>7:</b> 5'-AAAAGCAAAA<br>3'-TTTTTCGTTTT        | 3.23<br>(±0.6)                      | 0.068<br>(±0.003)   | 47.5           | 0.061<br>(±0.003) | 0.007<br>(±0.007) | 0.93       |
| <b>8:</b> 5'-TATATATATA<br>3'-ATATATATAT         | na                                  | 0.11<br>(±0.008)    | na             | 0.039<br>(±0.002) | 0.070<br>(±0.009) | -0.27      |
| <b>9:</b> 5'-TTATTGCAATA<br>3'-AATAACGTTAAT      | 4.77<br>(±0.15)                     | 0.39<br>(±0.02)     | 12.2           | 0.16<br>(±0.03)   | 0.23<br>(±0.01)   | -0.16      |
| <b>10:</b> 5'-TATATGCATATA<br>3'-ATATACGTATAT    | 1.22<br>(±0.3)                      | 0.18<br>(±0.02)     | 6.8            | 0.045<br>(±0.009) | 0.14<br>(±0.015)  | -0.48      |
| <b>11:</b> 5'-GAAAAAAAAAAA<br>3'-CTTTTTTTTT      | 2.08<br>(±0.2)                      | 0.08<br>(±0.004)    | 26             | 0.07<br>(±0.0008) | 0.01<br>(±0.005)  | 0.68       |
| <b>12:</b> 5'-GAAAAAAAAAAGA<br>3'-CTTTTTTTTTCT   | 1.06<br>(±0.01)                     | 0.06<br>(±0.003)    | 17.7           | 0.05<br>(±0.002)  | 0.01<br>(±0.001)  | 0.60       |
| <b>13:</b> 5'-GAAAAAAAAACA<br>3'-CTTTTTTTTTGT    | 2.05<br>(±0.07)                     | 0.05<br>(±0.003)    | 41             | 0.017<br>(±0.001) | 0.032<br>(±0.002) | -0.28      |
| <b>14:</b> 5'-AAAAAAAAAAAC<br>3'-TTTTTTTTTTTG    | 0.28<br>(±0.01)                     | 0.021<br>(±0.002)   | 13.3           | 0.021<br>(±0.002) | ND                | NA         |
| <b>15:</b> 5'-AGAAAAAAAAAAG<br>3'-TCTTTTTTTTTTC  | 0.30<br>(±0.001)                    | 0.01<br>(±0.001)    | 30             | 0.01<br>(±0.001)  | ND                | NA         |
| <b>16:</b> 5'-ACAAAAAAAAAAG<br>3'-TGTTTTTTTTTC   | 1.71<br>(±0.03)                     | 0.048<br>(±0.005)   | 36             | 1.048<br>(±0.005) | ND                | NA         |
| <b>17:</b> 5'-ATATAGCTATAT<br>3'-TATATCGATATA    | 3.95<br>(±1.1)                      | 0.36<br>(±0.06)     | 11.0           | 0.27<br>(±0.003)  | 0.08<br>(±0.006)  | 0.53       |
| <b>18:</b> 5'-ATATACGTATAT<br>3'-TATATGCATATA    | 2.30<br>(±0.06)                     | 0.14<br>(±0.02)     | 16.4           | 0.12<br>(±0.02)   | 0.019<br>(±0.003) | 0.80       |
| <b>19:</b> 5'-ATTATTGCTATT<br>3'-TAATAACGATAA    | 4.41<br>(±0.25)                     | 0.13<br>(±0.015)    | 33.9           | 0.10<br>(±0.01)   | 0.026<br>(±0.004) | 0.59       |
| <b>20:</b> 5'-ATTATCGTTATT<br>3'-TAATAGCAATAA    | 1.27<br>(±0.03)                     | 0.26<br>(±0.08)     | 4.9            | 0.20<br>(±0.06)   | 0.058<br>(±0.02)  | 0.54       |
| <b>21:</b> 5'-ATTATCGATAT<br>3'-TAATAGCTATAA     | 0.64<br>(±0.01)                     | 0.15                | 4.3            | 0.095<br>(±0.005) | 0.05<br>(±0.002)  | 0.28       |
| <b>22:</b> 5'-GCAAAAAAAAAAGC<br>3'-CGTTTTTTTTTCG | 1.23<br>(±0.13)                     | ND                  | NA             | ND                | ND                | NA         |
| <b>23:</b> 5'-CGAAAAAAAAACG<br>3'-GCTTTTTTTTTGC  | 0.81<br>(±0.10)                     | ND                  | NA             | ND                | ND                | NA         |
| <b>24:</b> 5'-GCAAAAAAAAAAAG<br>3'-CTTTTTTTTTTC  | 1.12<br>(±0.15)                     | ND                  | NA             | ND                | ND                | NA         |
| <b>25:</b> 5'-AAAAAAAAAAAAA                      | NA                                  | 0.071               | NA             | 0.049             | 0.022             | 0.65       |

|                             |           |          |      |          |           |      |
|-----------------------------|-----------|----------|------|----------|-----------|------|
| (single strand)             |           | (±0.008) |      | (±0.004) | (±0.004)  |      |
| <b>26:</b> 5'-GAAAAAAAAAAG  | ND        | 0.031    | NA   | 0.025    | 0.006     | 0.62 |
| (single strand)             |           | (±0.002) |      | (±0.002) | (±0.0005) |      |
| <b>27:</b> 5'-TTAGG         | 0.054     | 0.064    | 0.84 | 0.050    | 0.014     | 0.54 |
| (single strand)             | (±0.0001) | (±0.002) |      | (±0.002) | (±0.0005) |      |
| <b>28:</b> 5'-ATTATTGCTATT  | 0.44      | 0.27     | 1.6  | 0.19     | 0.07      | 0.43 |
| (single strand)             | (±0.005)  | (±0.01)  |      | (±0.015) | (±0.001)  |      |
| <b>29:</b> 5'- ATTATCGTTATT | 0.42      | 0.48     | 0.87 | 0.35     | 0.13      | 0.43 |
| (single strand)             | (±0.03)   | (±0.07)  |      | (±0.05)  | (±0.03)   |      |
| <b>30:</b> 5'-ATATAGCTATAT  | ND        | 0.11     | NA   | 0.076    | 0.031     | 0.39 |
| (single strand, 37° C)      |           | (±0.005) |      | (±0.003) | (±0.002)  |      |

<sup>a</sup> R=dG/dA at 0°C.

Figure S8:  $^1\text{H}$  NMR spectrum of compound 5a.

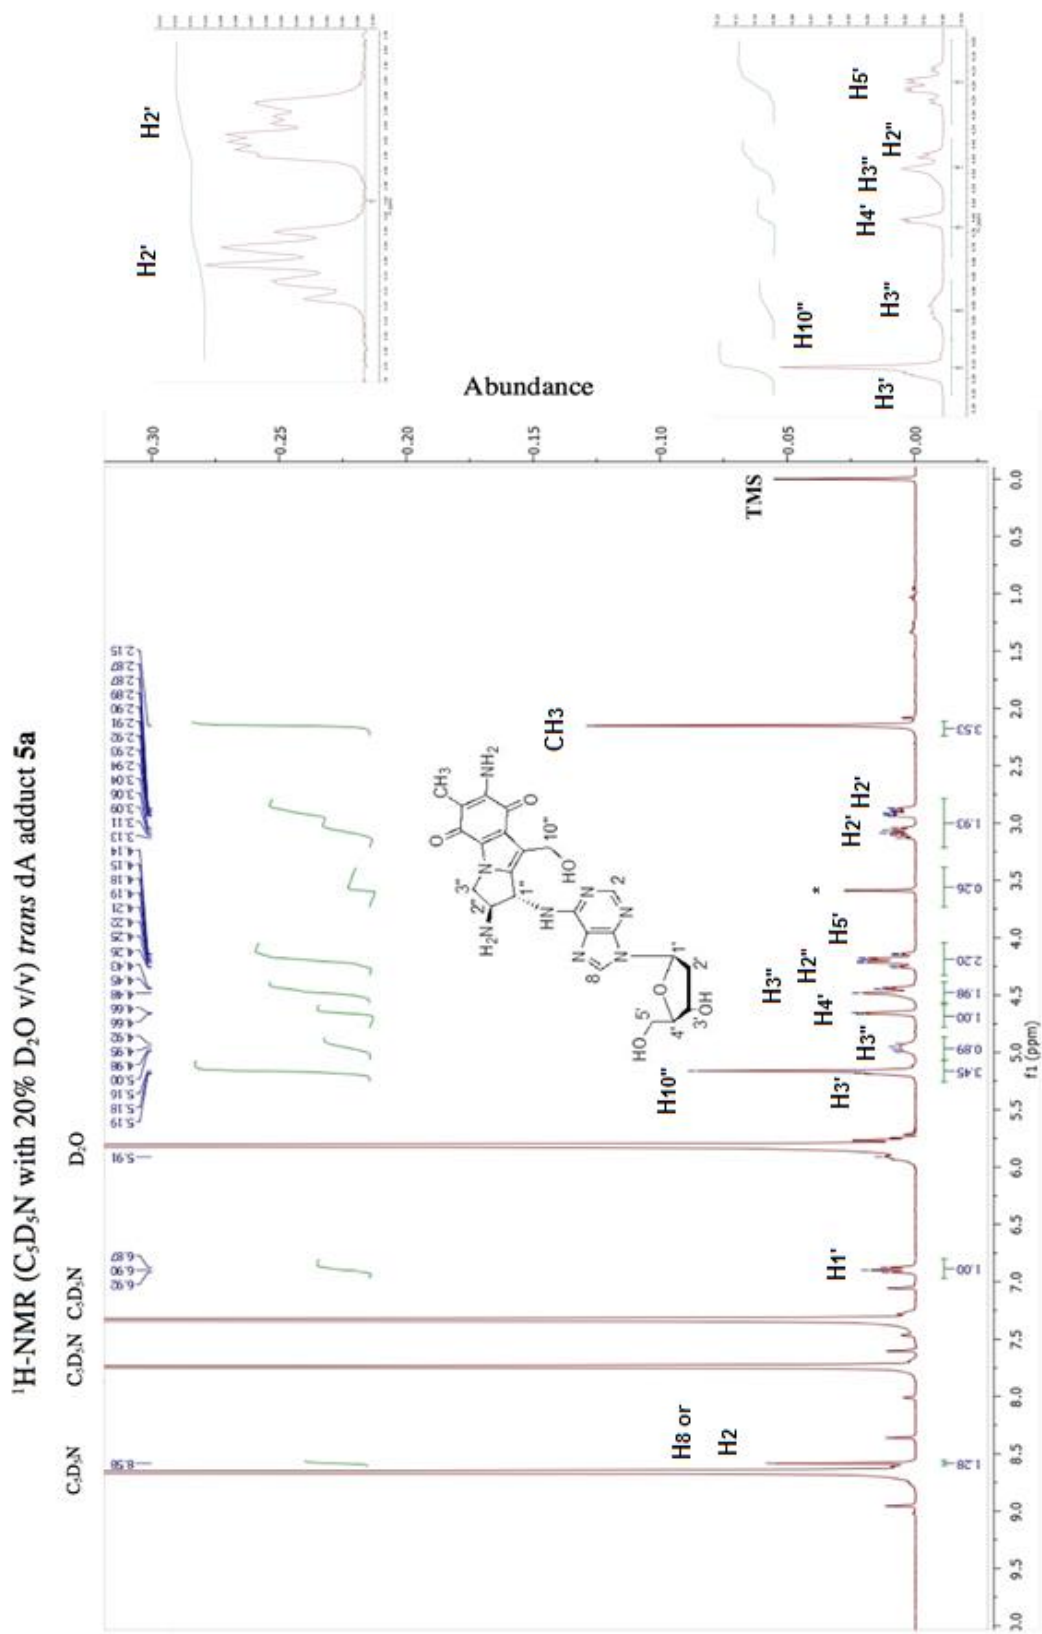

Figure S9: 2-D COSY NMR spectrum of compound 5a.

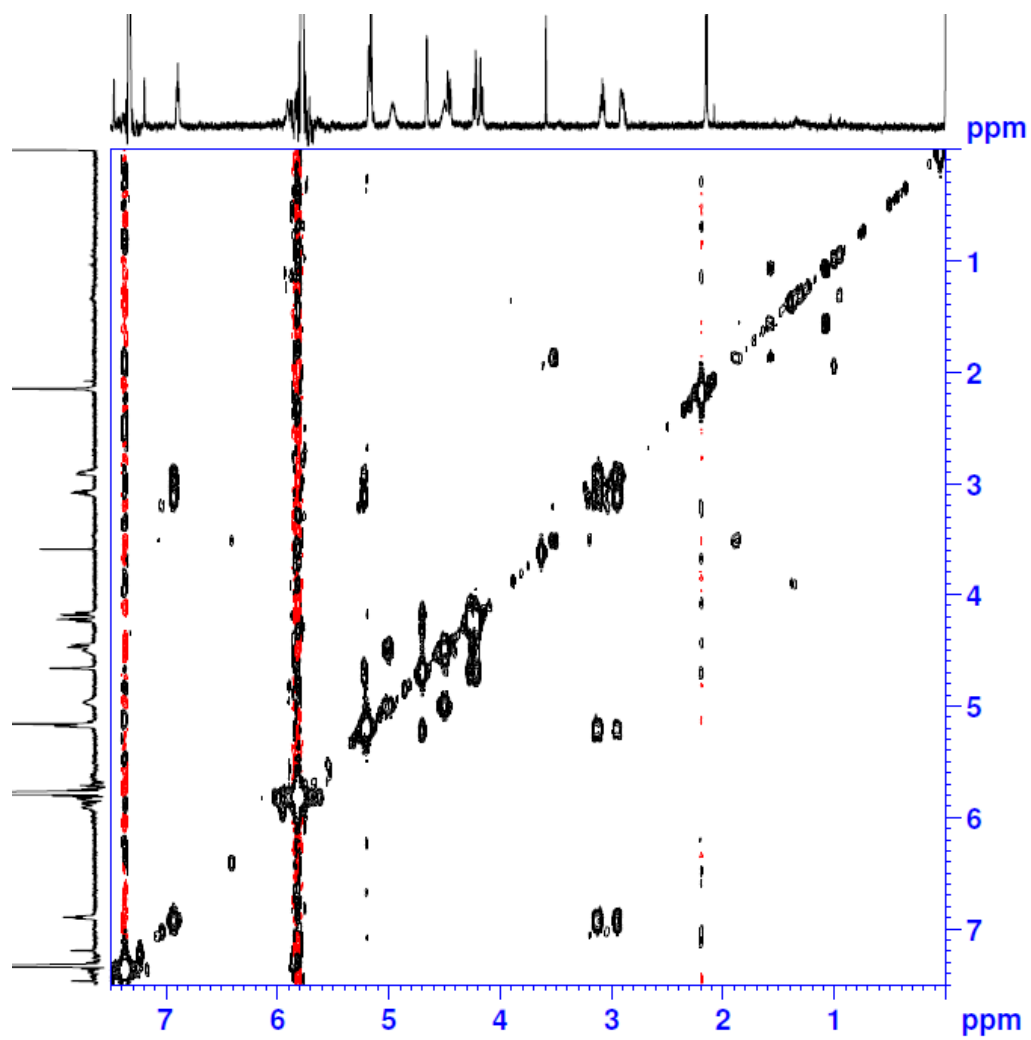

Figure S10:  $^1\text{H}$  NMR spectrum of compound **5b**.

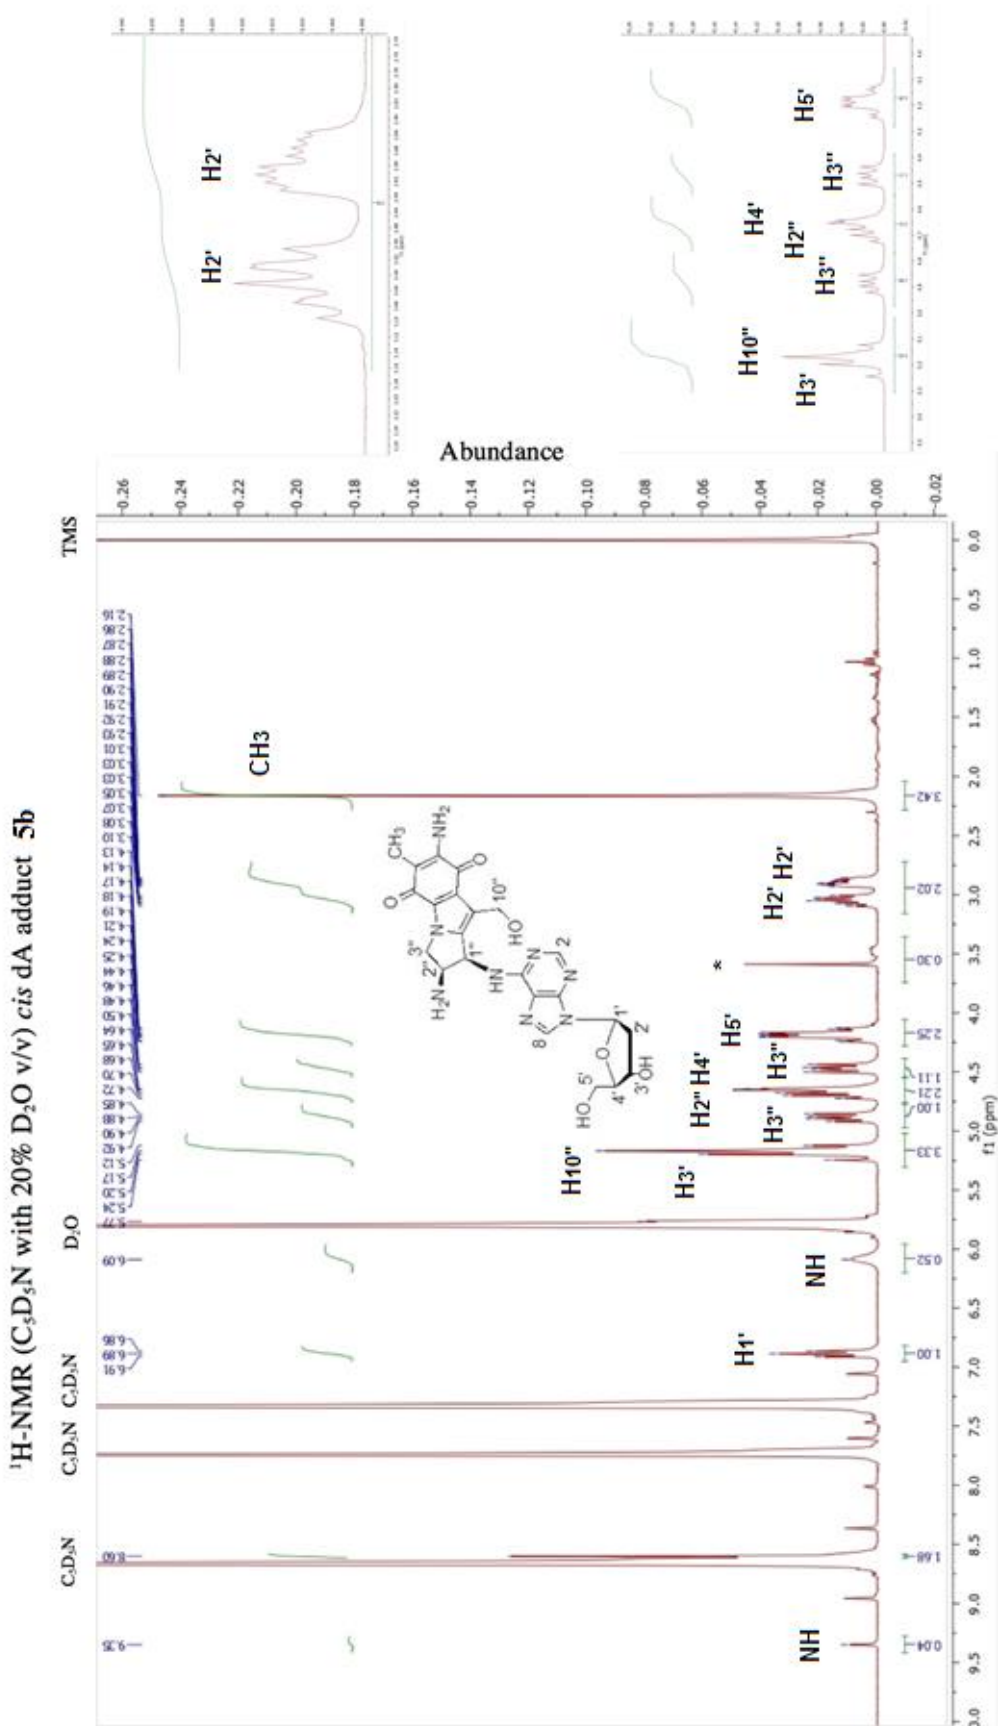

**Figure S11:** 2-D COSY NMR spectrum of compound **5b**.

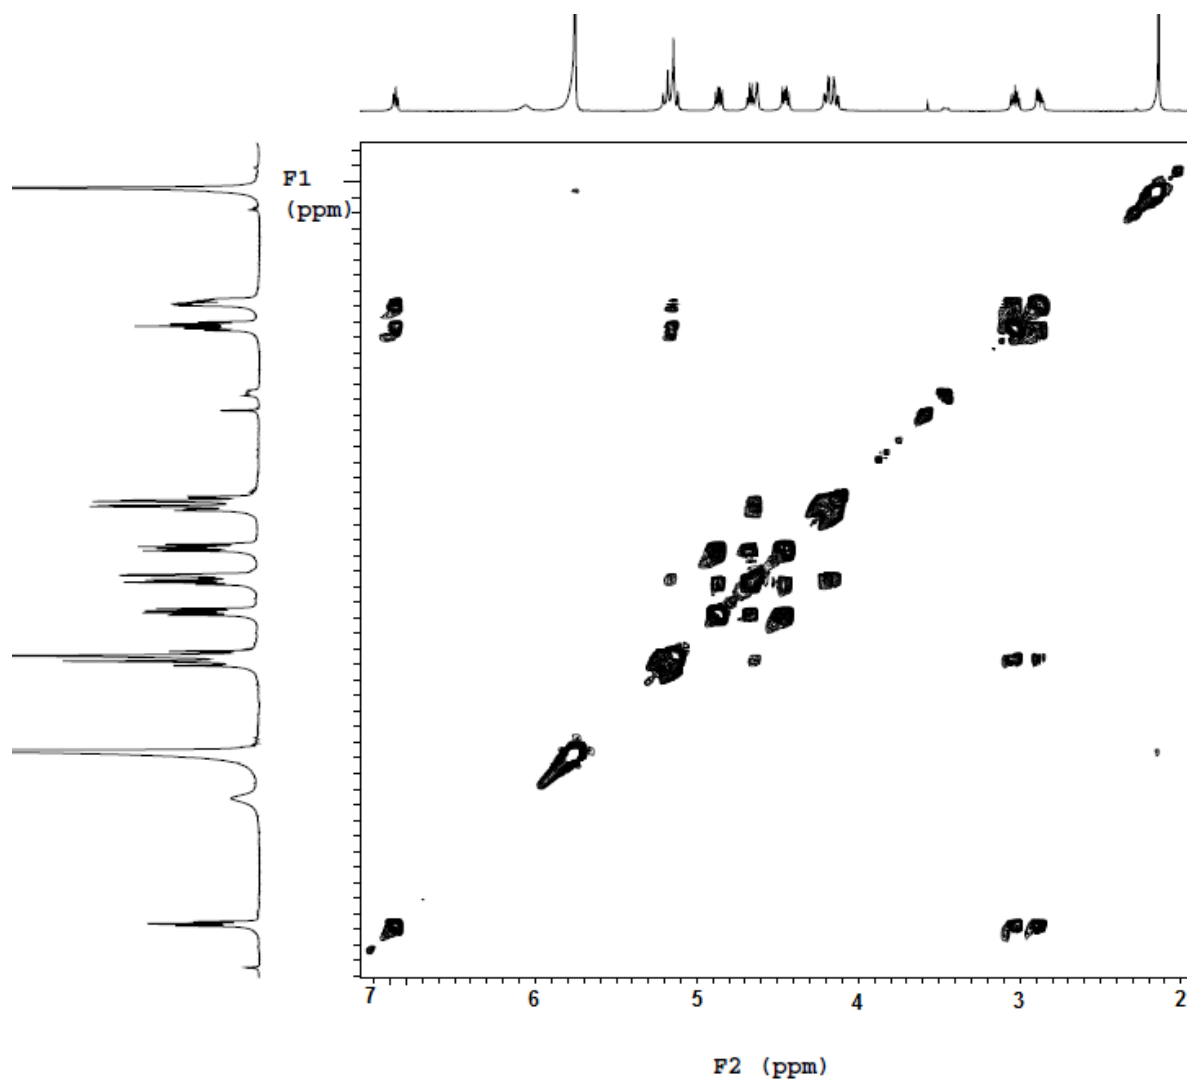

Supplement: NIHMS1561416-supplement-supporting_info.pdf [file NIHMS1561416-supplement-supporting_info.pdf]
